# Supplementary material for: When weight is an encumbrance; avoidance of stairs by different demographic groups
Source: PubMed Central journal article supplement (PMC6980638; doi:10.1371/journal.pone.0228044), 2020-01-24
Supplement: pone.0228044.s002.pdf [file pone.0228044.s002.pdf]

**Supplementary file 2: When weight is an encumbrance; avoidance of stairs by different demographic groups.**

**Building characteristics for study 1**

Table 1: Building characteristics, sample sizes and % avoidance of stairs by using the elevator for each direction of travel.

| Name                | Employees        | Floors | Elevators | Up<br>n = | Elevator<br>up %  | Down<br>n = | Elevator<br>down % |
|---------------------|------------------|--------|-----------|-----------|-------------------|-------------|--------------------|
| Civic Centre        | Local government | 4      | 1         | 1,047     | 29.1              | 872         | 13.8               |
| Thames House        | Commercial       | 4      | 1         | 2,275     | 39.6              | 1,746       | 17.2               |
| Sutton House        | Local government | 4      | 2         | 2,625     | 41.9              | 2,057       | 26.4               |
| Christchurch House  | Local government | 5      | 2         | 2,702     | 26.6 <sup>a</sup> | 2,481       | 18.5               |
| Chamber of Commerce | Commercial       | 6      | 2         | 1,827     | 59.6              | 1,483       | 30.4               |
| Broadgate House     | Local government | 6      | 2         | 1,932     | 54.6              | 2,022       | 25.9               |
| Triplex House       | Commercial       | 10     | 2         | 2,199     | 76.0              | 1,673       | 62.8               |
| Total               |                  |        |           | 14,607    | 46.8 <sup>b</sup> | 12,334      | 28.0               |

a The stairs in this building were reached some 7m before the elevators and represented the shorter route between the entrance and the upper floors. Distance minimization in buildings is associated with reduced elevator avoidance (Olander & Eves, 2011).

b Sample-size weighted average of avoidance.

**Reference**

Olander E, Eves FF. Cost and effectiveness of two stair climbing interventions - less is more. *Am J Health Prom* 2011, **25**:231-236.
