# Supplementary material for: When weight is an encumbrance; avoidance of stairs by different demographic groups
Source: PubMed Central journal article supplement (PMC6980638; doi:10.1371/journal.pone.0228044), 2020-01-24
Supplement: pone.0228044.s003.pdf [file pone.0228044.s003.pdf]

Supplementary File 3: When weight is an encumbrance; avoidance of stairs by different demographic groups.

Outdoor sites where the alternative to stairs was a sloped ramp.

Figure 1: Chamberlain Square

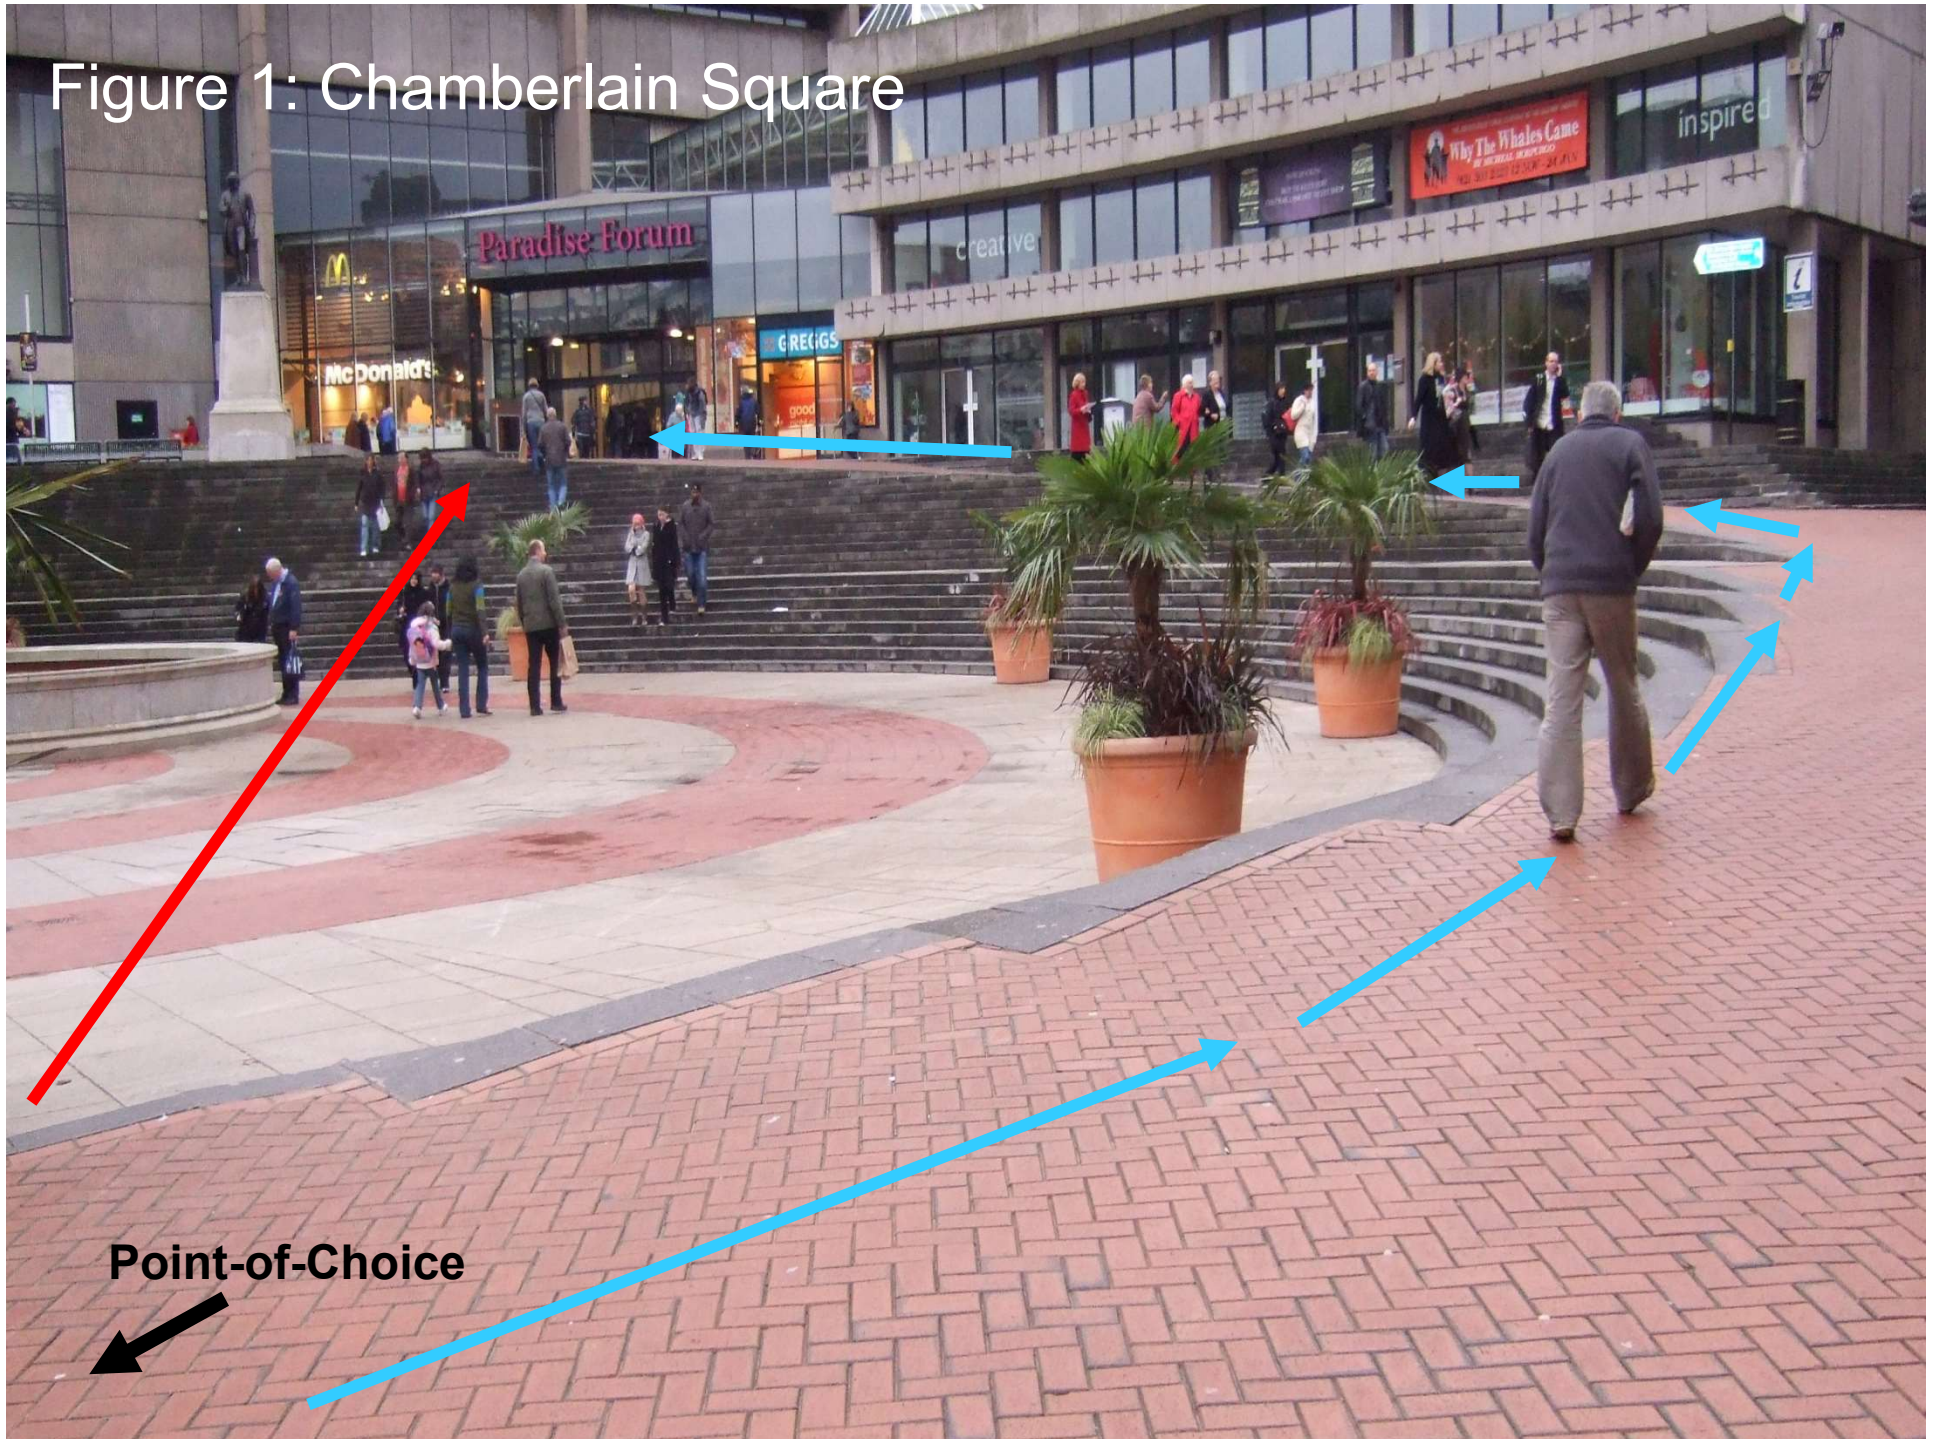



Figure 2: University station

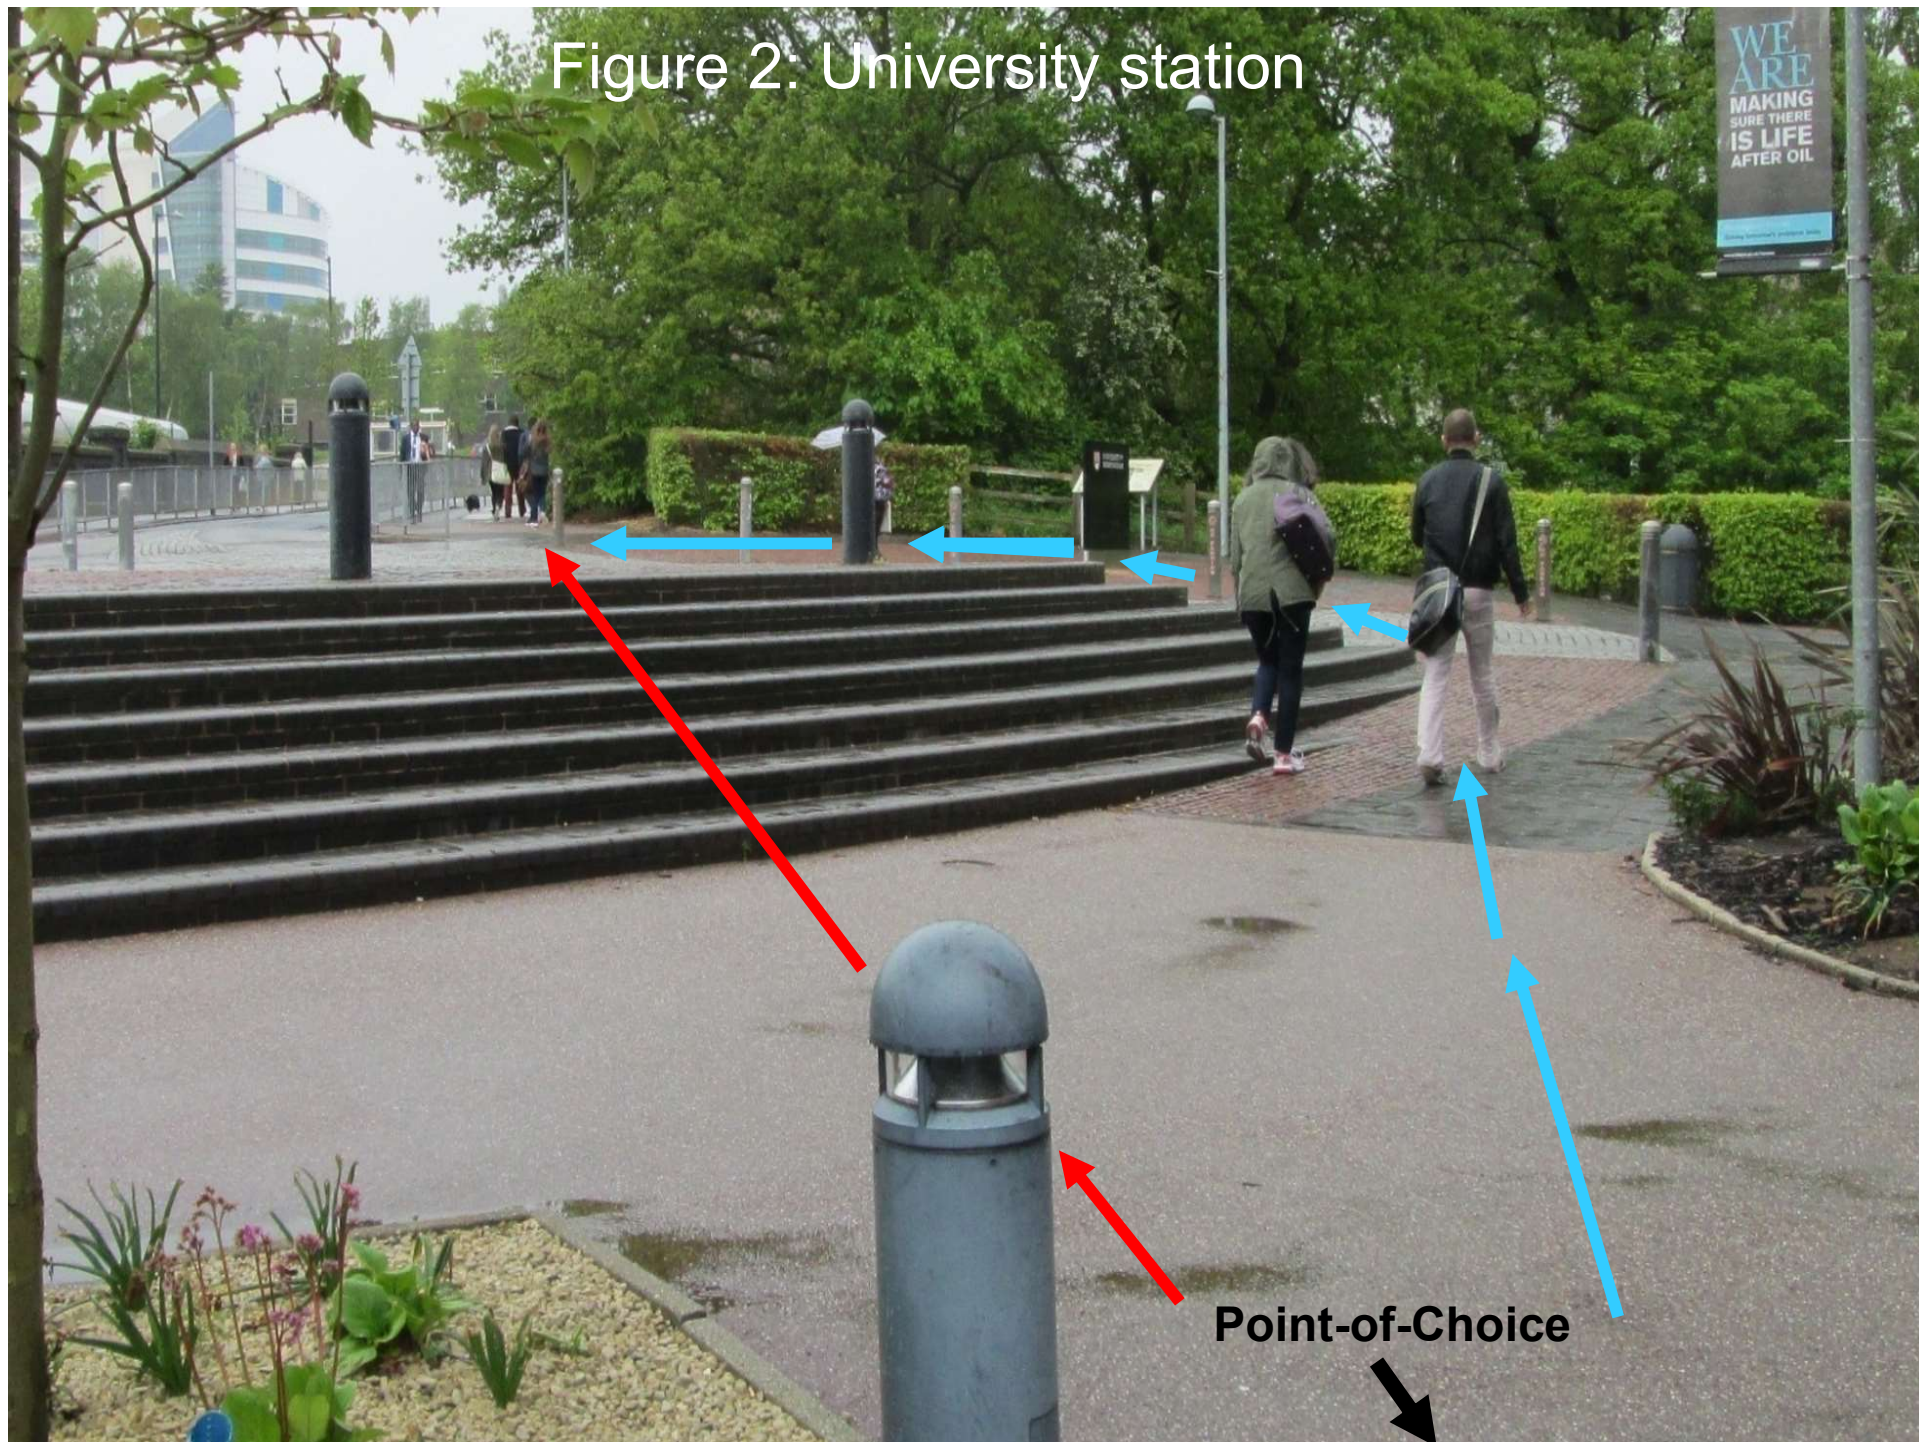

Point-of-Choice
